# Supplementary material
Source: PubMed Central journal article supplement (PMC3173195)
Supplement: supp_M111.266692_jbc.M111.266692-1.pdf [file supp_M111.266692_jbc.M111.266692-1.pdf]

Fig. S1

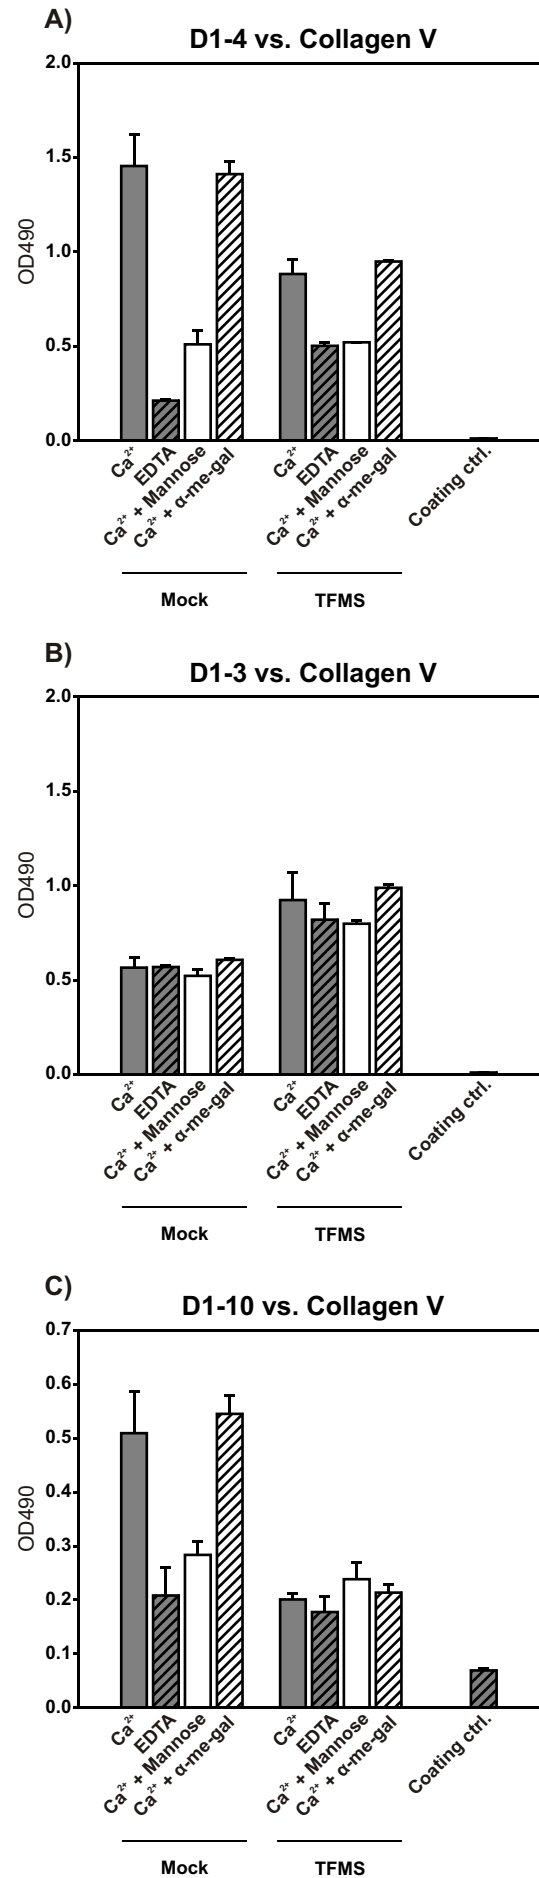

**Figure S1. Binding of recombinant uPARAP variants to deglycosylated collagen type V.** Binding of recombinant uPARAP variants to mock treated and deglycosylated collagen was performed and represented as described in the legend to Fig. 4, except that the treated collagen was type V.
