# Supplementary material
Source: PubMed Central journal article supplement (PMC3173195)
Supplement: supp_M111.266692_jbc.M111.266692-2.pdf [file supp_M111.266692_jbc.M111.266692-2.pdf]

Fig. S2

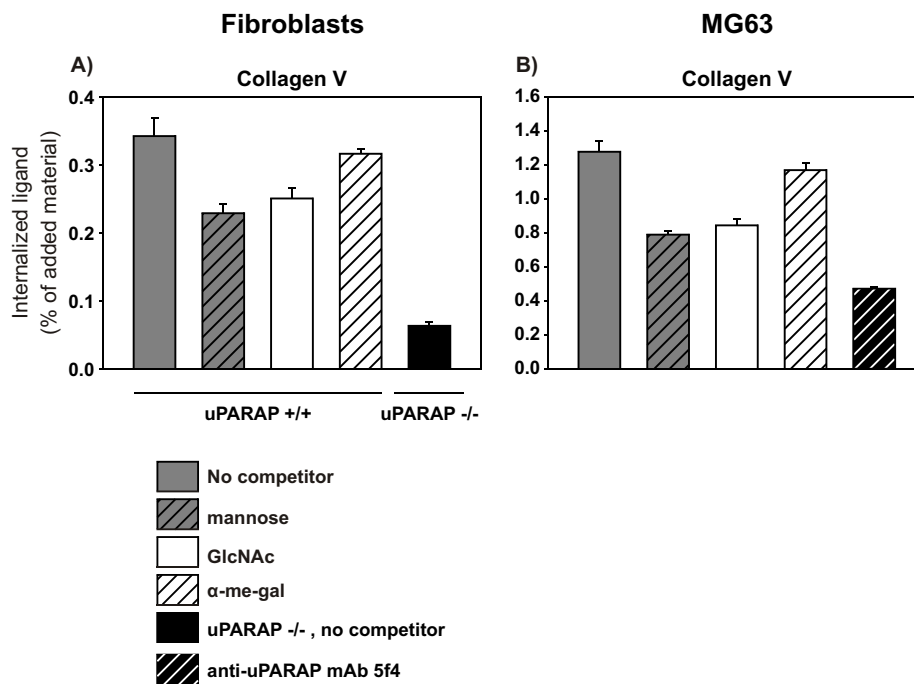

**Figure S2. Carbohydrate dependence of uPARAP mediated endocytosis of collagen type V.** Collagen internalization in mouse fibroblasts and human MG63 cells was analyzed as in Fig. 5, except that the labeled ligand was collagen type V.
