# Supplementary material
Source: PubMed Central journal article supplement (PMC3173195)
Supplement: supp_M111.266692_jbc.M111.266692-3.pdf [file supp_M111.266692_jbc.M111.266692-3.pdf]

Fig. S3

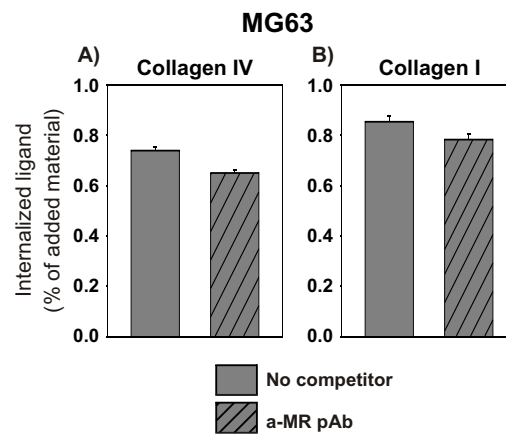

**Figure S3. Antibody against MR does not influence uPARAP-dependent endocytosis** The capacity of MG63 cells to internalize  $^{125}$ I labeled collagens type IV (A) and type I (B) was determined in the absence or presence of a-MR pAb (10  $\mu$ g/ml). Conditions were the same as described in the legend to Fig. 5.
